# Supplementary material for: Effects of sulfate modification of stoichiometric and lithium-rich LiNiO2 cathode materials
Source: Royal Society of Chemistry journal article supplement (doi:10.1039/d4ta00284a), 2024-01-01
Supplement: d4ta00284a1.pdf [file d4ta00284a1.pdf]

## Supporting information

# Effects of Sulfate Modification of Stoichiometric and Lithium-Rich LiNiO<sub>2</sub> Cathode Materials

Bo Dong<sup>1,4,\*</sup>, Andrey Poletayev<sup>2,4</sup>, Jonathon P. Cottom<sup>2,4</sup>, Javier Castells-Gil<sup>1,4</sup>, Ben Spencer<sup>5</sup>, Cheng Li<sup>6</sup>, Pengcheng Zhu<sup>3,4</sup>, Yongxiu Chen<sup>3,4</sup>, Jaime-Marie Price<sup>1,4</sup>, Laura L. Driscoll<sup>1,4</sup>, Phoebe K. Allan<sup>1,4</sup>, Emma Kendrick<sup>3,4</sup>, M. Saiful Islam<sup>2,4\*</sup>, Peter R. Slater<sup>1,4\*</sup>

*1 School of Chemistry, University of Birmingham, Birmingham B15 2TT, UK*

*2 Department of Materials, University of Oxford, Oxford, OX1 3PH, UK*

*3 School of Metallurgy and Materials, University of Birmingham,  
Birmingham B15 2TT, UK*

*4 The Faraday Institution, Harwell Science and Innovation Campus, Didcot OX11 0RA, UK*

*5 Department of Materials and Henry Royce Institute, The University of Manchester, Oxford  
Road, Manchester, M13 9PL, UK*

*6 Neutron Sciences Directorate, Spallation Neutron Source (SNS), Oak Ridge National  
Laboratory, 37830, TN, US*

*Email: [b.dong@bham.ac.uk](mailto:b.dong@bham.ac.uk); [p.r.slater@bham.ac.uk](mailto:p.r.slater@bham.ac.uk); [Saiful.islam@materials.ox.ac.uk](mailto:Saiful.islam@materials.ox.ac.uk)*

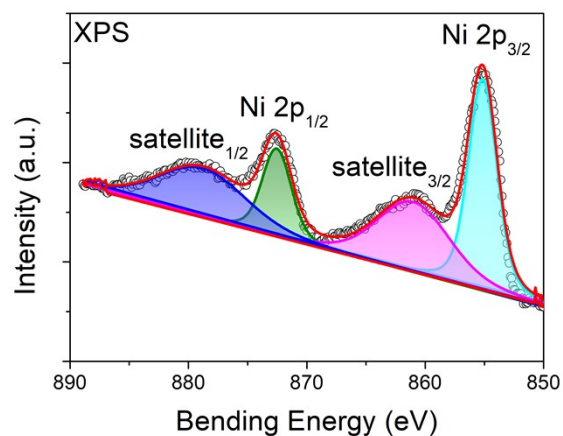

Figure S1 XPS of  $\text{Li}_{1.1}\text{Ni}_{0.85}\text{S}_{0.05}\text{O}_{2-x}$  (fitted as  $\text{Ni}^{3+}$ )

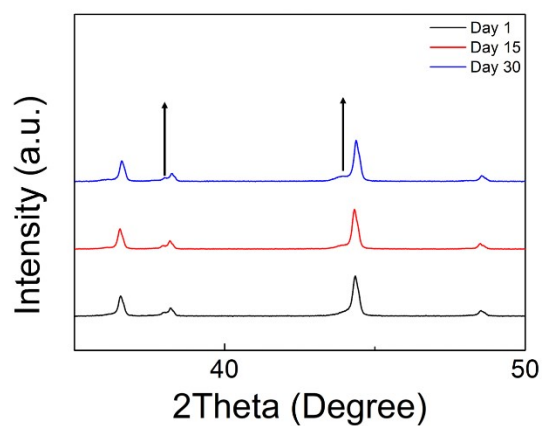

Figure S2 XRD patterns of  $\text{LiNiO}_2$  (solid state route) after the exposure in air after 1, 15 and 30 days focusing on the zoomed-in region.

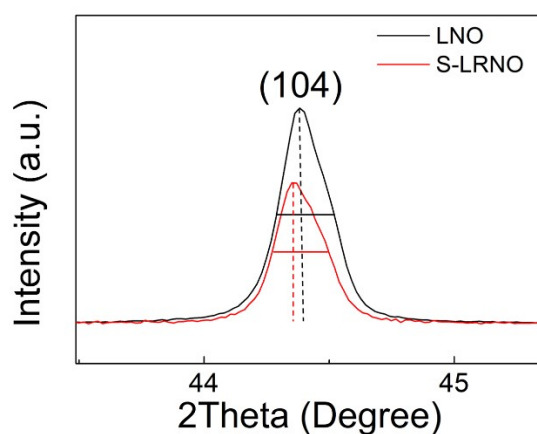

Figure S3 The (104) peak of LNO and S-LRNO prepared using solid state route.

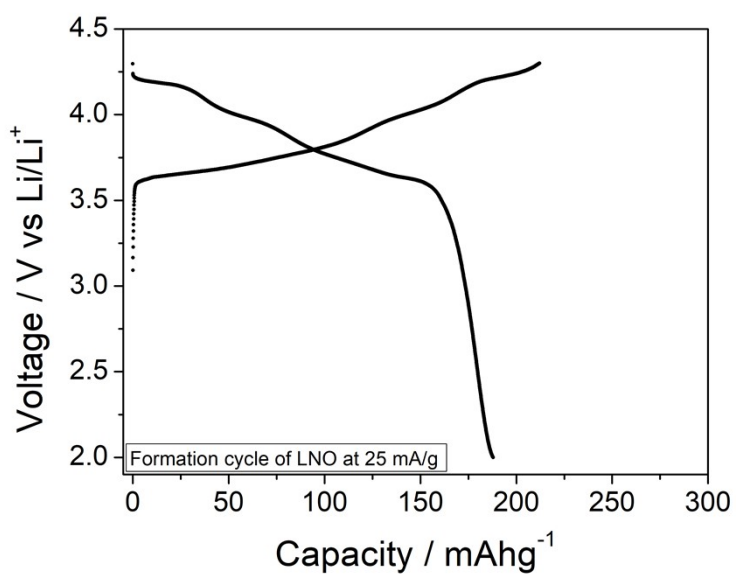

Figure S4 The charge-discharge curve at the formation cycle of LNO (solid state route) at 25 mA/g.

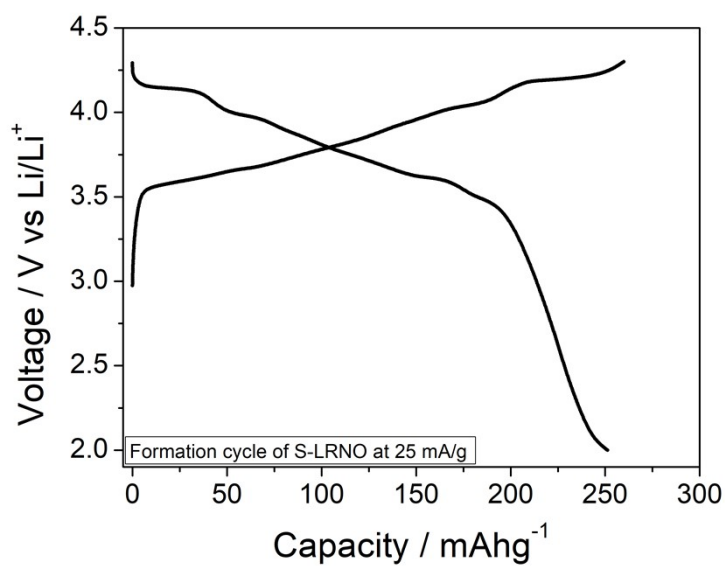

Figure S5 The charge-discharge curve at the formation cycle of S-LRNO (solid state route) at 25 mA/g.

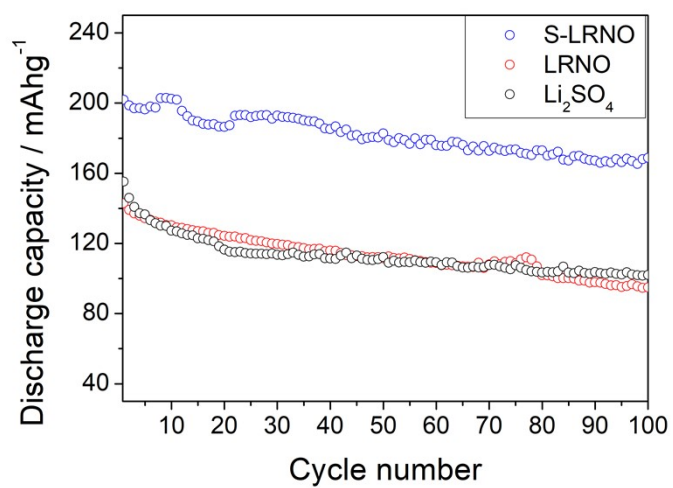

Figure S6 The cycling performance of LRNO, S-LRNO and LRNO with 5%Li<sub>2</sub>SO<sub>4</sub> at 25 mA/g.

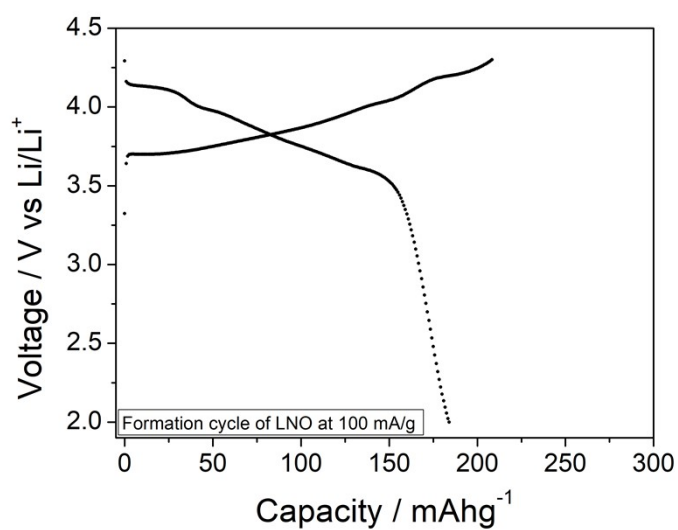

Figure S7 The charge-discharge curve at the formation cycle of LNO (co-precipitation route) at 100 mA/g.

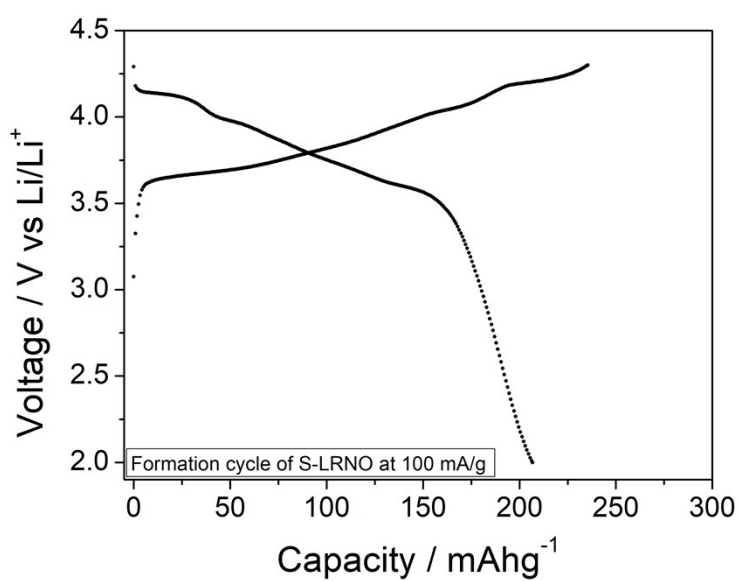

Figure S8 The charge-discharge curve at the formation cycle of S-LRNO (co-precipitation route) at 100 mA/g.
